# Supplementary material for: Chemical lattice strain in nonstoichiometric oxides: an overview
Source: Royal Society of Chemistry journal article supplement (doi:10.1039/d1ta08407k), 2022-01-01
Supplement: d1ta08407k1.pdf [file d1ta08407k1.pdf]

SUPPLEMENTARY

to

**Chemical lattice strain in nonstoichiometric oxides: an overview**

*Dmitry S. Tsvetkov<sup>\*1</sup>, Vladimir V. Sereda<sup>1,2</sup>, Dmitry A. Malyshkin<sup>1,2</sup>, Ivan L. Ivanov<sup>1,2</sup>, Andrey Yu. Zuev<sup>1</sup>*

<sup>1</sup>Institute of Natural Sciences and Mathematics, Ural Federal University,  
620002, 19 Mira St., Yekaterinburg, Russia

<sup>2</sup>Laboratory of Hydrogen Energy, Ural Federal University,  
620002, 19 Mira St., Ekaterinburg, Russia

\*corresponding author: dmitry.tsvetkov@urfu.ru

Table S1. Chemical expansion coefficients for some fluorite-type oxides  $Ce_{1-x}R_xO_{2-\delta}$  (R=Pr, Gd, Y, Sm, Zr)

| Oxide                                  | Temperatures, °C | $\delta$ range | $\beta = \varepsilon_{chem}/\Delta\delta$ | Source |
|----------------------------------------|------------------|----------------|-------------------------------------------|--------|
| $CeO_{2-\delta}$                       | 900              | 0.02-0.20      | 0.092                                     | 1      |
|                                        |                  | 0.02-0.10      | 0.101                                     | 2      |
|                                        |                  | 0.12-0.18      | 0.073                                     |        |
| $Ce_{0.9}Pr_{0.1}O_{2-\delta}$         | 650-900          | 0.01-0.06      | 0.087                                     | 3      |
| $Ce_{0.8}Pr_{0.2}O_{2-\delta}$         | 800              | 0.05-0.10      | 0.084                                     | 4      |
|                                        |                  | 0.10-0.15      | 0.108                                     |        |
| $Ce_{0.9}Gd_{0.1}O_{2-\delta}$         | 700-900          | 0.00-0.14      | 0.101                                     | 5      |
|                                        | 700-900          | 0.01-0.07      | 0.132                                     | 6      |
|                                        | 800-900          | 0.08-0.14      | 0.078                                     | 6      |
| $Ce_{0.8}Gd_{0.2}O_{2-\delta}$         | 700-800          | 0.10-0.15      | 0.055                                     | 7, 8   |
| $Ce_{0.9}Y_{0.1}O_{2-\delta}$          | 700-1000         | 0.05-0.23      | 0.086                                     | 9      |
| $Ce_{0.8}Y_{0.2}O_{2-\delta}$          | 700-1000         | 0.10-0.25      | 0.075                                     | 9      |
| $Ce_{0.8}Y_{0.2}O_{2-\delta}$          | 900              | 0.12-0.20      | 0.080                                     | 10     |
| $Ce_{0.9}Sm_{0.1}O_{2-\delta}$         | 700-1000         | 0.05-0.18      | 0.088                                     | 9      |
| $Ce_{0.8}Sm_{0.2}O_{2-\delta}$         | 700-1000         | 0.10-0.20      | 0.092                                     | 9      |
| $Ce_{0.5}Zr_{0.4}Pr_{0.1}O_{2-\delta}$ | 700-900          | 0.00-0.12      | 0.046                                     | 5      |
| $Ce_{0.5}Zr_{0.5}O_{2-\delta}$         | -                | 0.00-0.25      | 0.048                                     | 5      |
| $Ce_{0.8}Zr_{0.2}O_{2-\delta}$         | 700              | 0.06-0.15      | 0.055                                     | 11     |
|                                        | 800              | 0.05-0.15      | 0.044                                     |        |
|                                        | 900              | 0.05-0.15      | 0.062                                     |        |

Table S2. Chemical expansion coefficients for some  $La_{1-x}M_xCr_{1-y}B_yO_{3-\delta}$  substituted chromites at 1000 °C

| Oxide                                           | $\Delta\delta$ | $\beta = \varepsilon_{chem}/\Delta\delta$ | Source |
|-------------------------------------------------|----------------|-------------------------------------------|--------|
| $La_{0.8}Sr_{0.2}CrO_{3-\delta}$                | 0.10           | 0.016                                     | 12     |
| $La_{0.76}Sr_{0.24}CrO_{3-\delta}$              | 0.12           | 0.020                                     | 12     |
| $La_{0.7}Sr_{0.3}CrO_{3-\delta}$                | 0.15           | 0.023                                     | 12     |
| $La_{0.9}Ca_{0.1}CrO_{3-\delta}$                | 0.09           | 0.021                                     | 13     |
| $La_{0.8}Ca_{0.2}CrO_{3-\delta}$                | 0.04           | 0.028                                     | 13     |
| $La_{0.7}Ca_{0.3}CrO_{3-\delta}$                | 0.10           | 0.036                                     | 12     |
| $La_{0.8}Sr_{0.2}Cr_{0.97}V_{0.03}O_{3-\delta}$ | 0.07           | 0.027                                     | 13     |
| $La_{0.7}Ca_{0.3}Cr_{0.9}Al_{0.1}O_{3-\delta}$  | 0.12           | 0.034                                     | 12     |
| $La_{0.7}Ca_{0.3}Cr_{0.9}Ti_{0.1}O_{3-\delta}$  | 0.07           | 0.032                                     | 12     |
| $LaCr_{0.95}Mg_{0.05}O_{3-\delta}$              | 0.02           | 0.016                                     | 14     |
| $LaCr_{0.85}Mg_{0.15}O_{3-\delta}$              | 0.07           | 0.010                                     | 14     |

Table S3. Chemical expansion coefficients for some perovskite-like complex oxides containing Fe or Co

| Oxide                                                                                      | Temperatures, °C                       | $\Delta\delta$ | $\beta = \varepsilon_{chem}/\Delta\delta$ | Source |
|--------------------------------------------------------------------------------------------|----------------------------------------|----------------|-------------------------------------------|--------|
| $\text{Ba}_{0.5}\text{Sr}_{0.5}\text{Co}_{0.8}\text{Fe}_{0.2}\text{O}_{3-\delta}$          | room temperature<br>(annealed samples) | 0.22           | 0.012                                     | 15     |
|                                                                                            | 400-600                                | 0.15           | 0.033                                     | 16     |
|                                                                                            | 700-950                                | 0.17           | 0.019-0.021                               | 17     |
|                                                                                            | 600                                    | 0.09           | 0.026                                     | 18     |
|                                                                                            | 700                                    | 0.10           | 0.022                                     | 18     |
|                                                                                            | 800                                    | 0.11           | 0.019                                     | 18     |
|                                                                                            | 900                                    | 0.12           | 0.016                                     | 18     |
| $\text{SrCo}_{0.8}\text{Fe}_{0.2}\text{O}_{3-\delta}$                                      | 700-950                                | 0.19           | 0.026–0.032                               | 17     |
| $\text{SrFe}_{0.7}\text{Al}_{0.3}\text{O}_{3-\delta}$                                      | 750-950                                | 0.07           | 0.046                                     | 19     |
| $\text{La}_{0.8}\text{Sr}_{0.2}\text{Fe}_{0.7}\text{Ga}_{0.3}\text{O}_{3-\delta}$          | 900                                    | 0.04           | 0.039                                     | 20     |
| $\text{SrSn}_{0.65}\text{Fe}_{0.35}\text{O}_{3-\delta}$                                    | 700-1000                               | 0.015          | 0.032-0.041                               | 21     |
| $\text{SrTi}_{0.65}\text{Fe}_{0.35}\text{O}_{3-\delta}$                                    | 700-1000                               | 0.06           | 0.040-0.049                               | 22     |
| $\text{La}_{0.2}\text{Sr}_{0.8}\text{Fe}_{0.55}\text{Ti}_{0.45}\text{O}_{3-\delta}$        | 789-998                                | 0.05           | 0.052                                     | 23     |
| $\text{Nd}_{0.7}\text{Sr}_{0.3}\text{Fe}_{0.7}\text{Co}_{0.3}\text{O}_{3-\delta}$          | 750-1000                               | 0.05           | 0.046                                     | 24     |
| $\text{Nd}_{0.6}\text{Sr}_{0.4}\text{Fe}_{0.7}\text{Co}_{0.3}\text{O}_{3-\delta}$          | 650-1000                               | 0.10           | 0.041                                     | 24     |
| $\text{Nd}_{0.5}\text{Sr}_{0.5}\text{Fe}_{0.7}\text{Co}_{0.3}\text{O}_{3-\delta}$          | 550-1000                               | 0.13           | 0.036                                     | 24     |
| $\text{Nd}_{0.3}\text{Sr}_{0.7}\text{Fe}_{0.7}\text{Co}_{0.3}\text{O}_{3-\delta}$          | 550-1000                               | 0.17           | 0.040                                     | 24     |
| $\text{Nd}_{0.4}\text{Sr}_{0.6}\text{FeO}_{3-\delta}$                                      | 650-1000                               | 0.11           | 0.040                                     | 25     |
| $\text{Nd}_{0.3}\text{Sr}_{0.7}\text{FeO}_{3-\delta}$                                      | 650-1000                               | 0.12           | 0.041                                     | 25     |
| $\text{Nd}_{0.2}\text{Sr}_{0.8}\text{FeO}_{3-\delta}$                                      | 650-1000                               | 0.12           | 0.041                                     | 25     |
| $\text{Ba}_{0.95}\text{La}_{0.05}\text{FeO}_{3-\delta}$                                    | 850-950                                | 0.025          | 0.061-0.071                               | 26     |
| $\text{SrFeO}_{3-\delta}$                                                                  | 750-900                                | 0.2            | 0.0574                                    | 27     |
|                                                                                            | room temperature<br>(annealed samples) | 0.3            | 0.0197                                    | 27     |
| $\text{La}_{0.3}\text{Sr}_{0.7}\text{FeO}_{3-\delta}$                                      | 800                                    | 0.17           | 0.035                                     | 28     |
| $\text{La}_{0.5}\text{Sr}_{0.5}\text{FeO}_{3-\delta}$                                      | 800                                    | 0.10           | 0.059                                     | 29     |
| $\text{La}_{0.5}\text{Sr}_{0.5}\text{FeO}_{3-\delta}$                                      | 750-900                                | 0.065          | 0.033                                     | 30     |
| $\text{La}_{0.6}\text{Sr}_{0.4}\text{FeO}_{3-\delta}$                                      | 500-900                                | 0.16           | 0.020                                     | 31     |
|                                                                                            | 659-777                                | 0.05           | 0.037                                     | 32     |
| $\text{La}_{0.8}\text{Sr}_{0.2}\text{FeO}_{3-\delta}$                                      | 850-900                                | 0.025          | 0.015                                     | 33     |
| $\text{La}_{0.6}\text{Sr}_{0.4}\text{Fe}_{0.8}\text{Co}_{0.2}\text{O}_{3-\delta}$          | 600-800                                | 0.13           | 0.022                                     | 34     |
|                                                                                            | 700-900                                | 0.13           | 0.031                                     | 35     |
|                                                                                            | 700-890                                | 0.15           | 0.032                                     | 36     |
| $\text{La}_{0.6}\text{Sr}_{0.4}\text{Fe}_{0.6}\text{Co}_{0.4}\text{O}_{3-\delta}$          | 600-800                                | 0.13           | 0.030                                     | 34     |
| $\text{La}_{0.6}\text{Sr}_{0.4}\text{Fe}_{0.5}\text{Co}_{0.5}\text{O}_{3-\delta}$          | 500-900                                | 0.17           | 0.018                                     | 37     |
| $\text{La}_{0.6}\text{Sr}_{0.4}\text{Fe}_{0.4}\text{Co}_{0.6}\text{O}_{3-\delta}$          | 600-800                                | 0.12           | 0.028                                     | 34     |
| $\text{La}_{0.6}\text{Sr}_{0.4}\text{Fe}_{0.2}\text{Co}_{0.8}\text{O}_{3-\delta}$          | 600-800                                | 0.14           | 0.024                                     | 34     |
|                                                                                            | 800                                    | 0.18           | 0.022                                     | 38     |
| $\text{La}_{0.5}\text{Sr}_{0.5}\text{Fe}_{0.5}\text{Co}_{0.5}\text{O}_{3-\delta}$          | 800-1000                               | 0.12           | 0.036-0.039                               | 39     |
| $\text{La}_{0.1}\text{Sr}_{0.9}\text{Fe}_{0.2}\text{Co}_{0.8}\text{O}_{3-\delta}$          | 900-1000                               | 0.12           | 0.047                                     | 40     |
| $\text{La}_{0.3}\text{Sr}_{0.7}\text{CoO}_{3-\delta}$                                      | 901                                    | 0.13           | 0.035                                     | 41     |
| $\text{La}_{0.5}\text{Sr}_{0.5}\text{CoO}_{3-\delta}$                                      | 800                                    | 0.12           | 0.035                                     | 39     |
| $\text{La}_{0.6}\text{Sr}_{0.4}\text{CoO}_{3-\delta}$                                      | 500-900                                | 0.17           | 0.022                                     | 37     |
|                                                                                            | 892                                    | 0.11           | 0.030                                     | 41     |
| $\text{La}_{0.8}\text{Sr}_{0.2}\text{CoO}_{3-\delta}$                                      | 891                                    | 0.07           | 0.025                                     | 41     |
| $\text{LaCoO}_{3-\delta}$                                                                  | 950-1050                               | 0.03           | 0.020                                     | 42     |
| $(\text{La}_{0.6}\text{Sr}_{0.4})_{0.99}\text{CoO}_{3-\delta}$                             | 900                                    | 0.05           | 0.027                                     | 43     |
| $(\text{La}_{0.6}\text{Sr}_{0.4})_{0.99}\text{Co}_{0.9}\text{Ni}_{0.1}\text{O}_{3-\delta}$ | 900                                    | 0.06           | 0.028                                     | 43     |

|                                                                                            |     |      |       |    |
|--------------------------------------------------------------------------------------------|-----|------|-------|----|
| $(\text{La}_{0.3}\text{Sr}_{0.7})_{0.99}\text{Co}_{0.9}\text{Ni}_{0.1}\text{O}_{3-\delta}$ | 900 | 0.04 | 0.033 | 43 |
|--------------------------------------------------------------------------------------------|-----|------|-------|----|

Table S4. Chemical expansion coefficients for some double perovskite oxides and Ruddlesden-Popper oxides

| Oxide                                                                                    | Temperatures, °C | $\delta$ range | $\beta_a = \varepsilon_{chem}(a)/\Delta\delta$ | $\beta_c = \varepsilon_{chem}(c)/\Delta\delta$ | Source |
|------------------------------------------------------------------------------------------|------------------|----------------|------------------------------------------------|------------------------------------------------|--------|
| LaBaCo <sub>2</sub> O <sub>6-<math>\delta</math></sub>                                   | 717-853          | 0.27-0.54      | 0.037-0.039                                    | 0.011-0.017                                    | 44     |
|                                                                                          | 1000             | 0.76-0.84      | 0.026                                          | -0.016                                         | 45, 46 |
| PrBaCo <sub>2</sub> O <sub>6-<math>\delta</math></sub>                                   | 573-777          | 0.43-0.80      | 0.013                                          | -0.005                                         | 47     |
|                                                                                          | 852              | 0.73-0.83      | 0.017                                          | -0.008                                         |        |
|                                                                                          | 900              | 0.55-0.96      | 0.002                                          | -0.009                                         | 48, 49 |
|                                                                                          | 200-1000         | 0.37-0.81      | 0.006                                          | -0.017                                         | 50 *   |
| NdBaCo <sub>2</sub> O <sub>6-<math>\delta</math></sub>                                   | 573-777          | 0.49-0.86      | 0.010-0.011                                    | -0.008                                         | 51     |
|                                                                                          | 852              | 0.71-0.90      | 0.008                                          | -0.007                                         |        |
|                                                                                          | 200-1000         | 0.44-0.86      | 0.013                                          | -7.04·10 <sup>-5</sup>                         | 50 **  |
| GdBaCo <sub>2</sub> O <sub>6-<math>\delta</math></sub>                                   | 350              | 0.36-0.65      | –                                              | -0.005                                         | 52     |
|                                                                                          | 440              | 0.59-0.70      | 0.007                                          | -0.011                                         | 53     |
|                                                                                          | 600-750          | 0.60-0.95      | 0.008                                          | -0.009                                         | 54     |
| PrBaFe <sub>2</sub> O <sub>6-<math>\delta</math></sub>                                   | RT               | 0.50-0.90      | 0.0094                                         | -0.0323                                        | 55     |
| NdBaFe <sub>2</sub> O <sub>6-<math>\delta</math></sub>                                   |                  | 0.50-0.95      | 0.0088                                         | -0.0354                                        | 56, 57 |
| SmBaFe <sub>2</sub> O <sub>6-<math>\delta</math></sub>                                   |                  | 0.50-0.92      | 0.0080                                         | -0.0385                                        | 57-59  |
| EuBaFe <sub>2</sub> O <sub>6-<math>\delta</math></sub>                                   |                  | 0.59-0.85      | 0.0084                                         | -0.0381                                        | 60     |
| GdBaFe <sub>2</sub> O <sub>6-<math>\delta</math></sub>                                   |                  | 0.61-0.90      | 0.0078                                         | -0.0415                                        | 61     |
| PrBaFeMnO <sub>6-<math>\delta</math></sub>                                               |                  | RT             | 0.00-1.00                                      | 0.022                                          | -0.008 |
| PrBaMn <sub>2</sub> O <sub>6-<math>\delta</math></sub>                                   | RT               | 0.00-1.00      | 0.022                                          | 2.00·10 <sup>-4</sup>                          |        |
|                                                                                          | 711              | 0.83-1.00      | 0.011                                          | 0.016                                          | 63     |
| Sr <sub>2</sub> FeMoO <sub>6-<math>\delta</math></sub>                                   | RT               | 0.01-0.09      | 0.012                                          | -0.016                                         | 64     |
| La <sub>2</sub> NiO <sub>4+<math>\delta</math></sub>                                     | 800              | 0.01-0.06      | -0.028 ***                                     | 0.076 ***                                      | 65     |
| La <sub>2</sub> (Ni <sub>0.9</sub> Cu <sub>0.1</sub> )O <sub>4+<math>\delta</math></sub> | 600-900          | 0.01-0.07      | -0.051 ***                                     | 0.84 ***                                       | 66     |
| La <sub>2</sub> (Ni <sub>0.9</sub> Co <sub>0.1</sub> )O <sub>4+<math>\delta</math></sub> | 600-900          | 0.09-0.16      | -0.051 ***                                     | 0.62 ***                                       | 66     |
| La <sub>2</sub> (Ni <sub>0.9</sub> Fe <sub>0.1</sub> )O <sub>4+<math>\delta</math></sub> | 600-900          | 0.10-0.16      | -0.081 ***                                     | 0.70 ***                                       | 66     |

\* orthorhombic symmetry,  $\beta_b = \varepsilon_c(b)/\Delta\delta = 0.006$

\*\* orthorhombic symmetry,  $\beta_b = \varepsilon_c(b)/\Delta\delta = 0.017$

\*\*\* please note that as the oxygen content for Ruddlesden-Popper phases is written as “4+ $\delta$ ” unlike “x- $\delta$ ” for the other oxides, here negative  $\beta$  refers to expansion, and positive – to contraction upon reduction (oxygen loss)

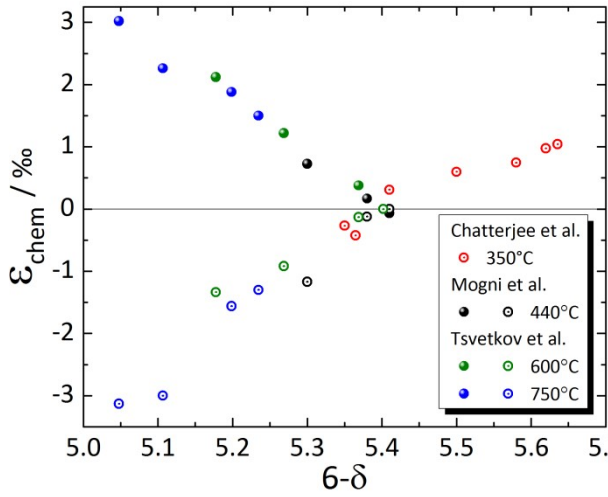

Fig. S1. Chemical strain of  $\text{GdBaCo}_2\text{O}_{6-\delta}$ :<sup>52-54</sup> filled symbols –  $\varepsilon_{chem}(a)$ , empty symbols –  $\varepsilon_{chem}(c)$

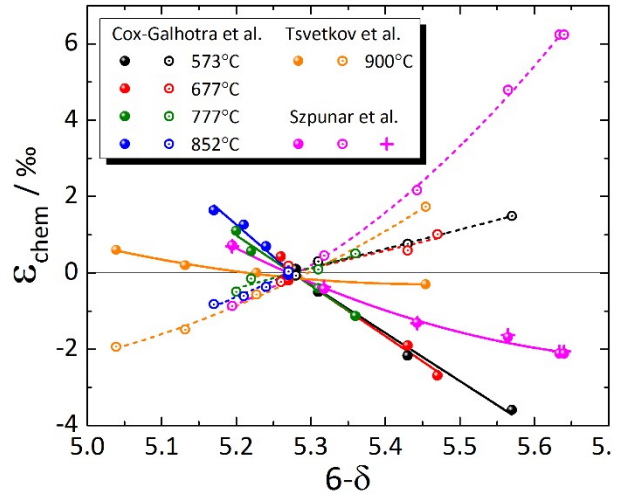

Fig. S2. Chemical strain of  $\text{PrBaCo}_2\text{O}_{6-\delta}$ :<sup>47-50</sup> filled symbols –  $\varepsilon_{chem}(a)$ , empty symbols –  $\varepsilon_{chem}(c)$ , crosses –  $\varepsilon_{chem}(b)$ , lines are given to guide the eye only

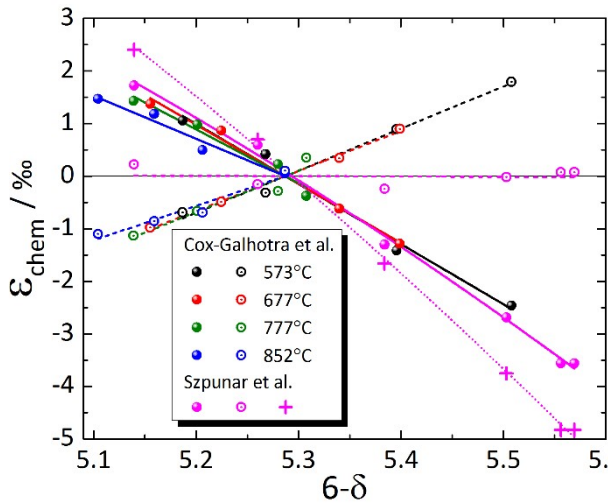

Fig. S3. Chemical strain of  $\text{NdBaCo}_2\text{O}_{6-\delta}$ :<sup>50, 51</sup> filled symbols –  $\varepsilon_{chem}(a)$ , empty symbols –  $\varepsilon_{chem}(c)$ , crosses –  $\varepsilon_{chem}(b)$ , lines are given to guide the eye only

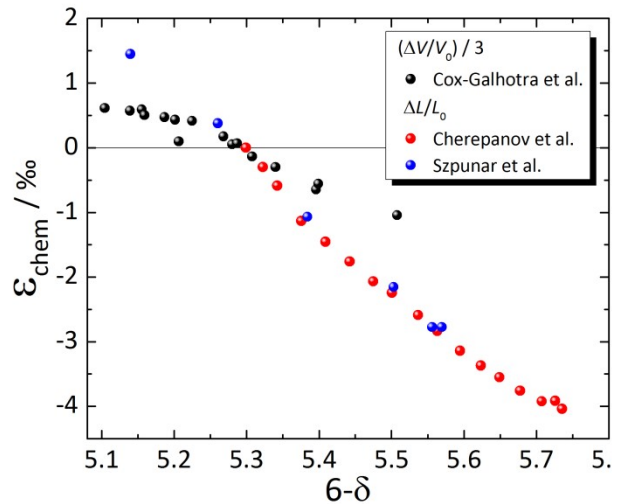

Fig. S4. Volumetric and average linear chemical strain of  $\text{NdBaCo}_2\text{O}_{6-\delta}$ :<sup>50, 51, 67</sup>

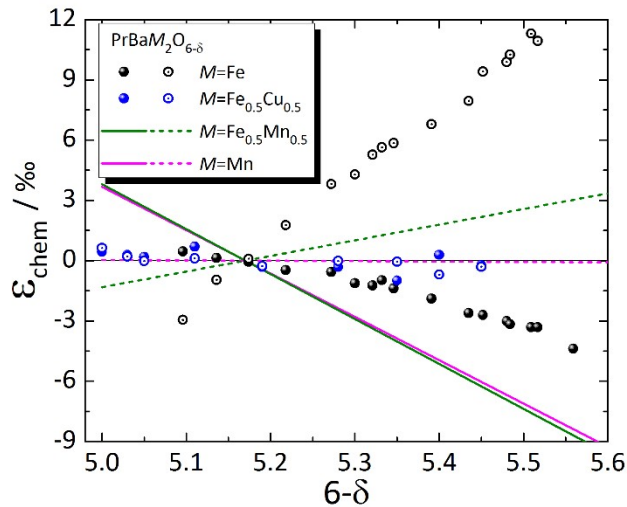

Fig. S5. Chemical strain of  $\text{PrBaM}_2\text{O}_{6-\delta}$  ( $M = \text{Fe}$ ,<sup>55</sup>  $\text{Fe}_{0.5}\text{Cu}_{0.5}$ ,<sup>68, 69</sup>  $\text{Fe}_{0.5}\text{Mn}_{0.5}$ ,<sup>62</sup>  $\text{Mn}$ ): filled symbols and solid lines –  $\varepsilon_{chem}(a)$ ,

## References

1. M. Mogensen, N. M. Sammes and G. A. Tompsett, *Solid State Ionics*, 2000, **129**, 63-94.
2. H.-W. Chiang, R. N. Blumenthal and R. A. Fournelle, *Solid State Ionics*, 1993, **66**, 85-95.
3. S. R. Bishop, H. L. Tuller, Y. Kuru and B. Yildiz, *Journal of the European Ceramic Society*, 2011, **31**, 2351-2356.
4. C. Chatzichristodoulou, P. V. Hendriksen and A. Hagen, *Journal of The Electrochemical Society*, 2010, **157**, B299.
5. S. R. Bishop, D. Marrocchelli, W. Fang, K. Amezawa, K. Yashiro and G. W. Watson, *Energy & Environmental Science*, 2013, **6**, 1142-1146.
6. S. R. Bishop, K. L. Duncan and E. D. Wachsman, *Acta Materialia*, 2009, **57**, 3596-3605.
7. S. Wang, H. Inaba, H. Tagawa and T. Hashimoto, *Journal of The Electrochemical Society*, 1997, **144**, 4076-4080.
8. V. P. Gorelov, V. B. Balakireva, I. Y. Yaroslavtsev, V. A. Kazantsev and E. G. Vaganov, *Russian Journal of Electrochemistry*, 2007, **43**, 888-893.
9. S. Wang, E. Oikawa and T. Hashimoto, *Journal of The Electrochemical Society*, 2004, **151**, E46.
10. Y. Li, E. R. Maxey, J. W. Richardson Jr, B. Ma, T. H. Lee and S.-J. Song, *Journal of the American Ceramic Society*, 2007, **90**, 1208-1214.
11. S. R. Bishop, T. Nakamura and K. Amezawa, *Solid State Ionics*, 2014, **261**, 1-4.
12. T. R. Armstrong, J. W. Stevenson, L. R. Pederson and P. E. Raney, *Journal of The Electrochemical Society*, 1996, **143**, 2919-2925.
13. F. Boroomand, E. Wessel, H. Bausinger and K. Hilpert, *Solid State Ionics*, 2000, **129**, 251-258.
14. P. H. Larsen, P. V. Hendriksen and M. Mogensen, *Journal of thermal analysis*, 1997, **49**, 1263-1275.
15. R. Kriegel, R. Kircheisen and J. Töpfer, *Solid State Ionics*, 2010, **181**, 64-70.
16. M. G. Sahini, J. R. Tolchard, K. Wiik and T. Grande, *Dalton Transactions*, 2015, **44**, 10875-10881.
17. A. A. Yaremchenko, S. M. Mikhalev, E. S. Kravchenko and J. R. Frade, *Journal of the European Ceramic Society*, 2014, **34**, 703-715.
18. S. McIntosh, J. F. Vente, W. G. Haije, D. H. A. Blank and H. J. M. Bouwmeester, *Chemistry of Materials*, 2006, **18**, 2187-2193.
19. A. A. Yaremchenko, E. V. Tsipis, A. V. Kovalevsky, J. C. Waerenborgh and V. V. Kharton, *Solid State Ionics*, 2011, **192**, 259-268.
20. O. Valentin, F. Millot, É. Blond, N. Richet, A. Julian, E. Véron and S. Ory, *Solid State Ionics*, 2011, **193**, 23-31.
21. C. S. Kim, N. H. Perry, S. R. Bishop and H. L. Tuller, *Journal of Electroceramics*, 2018, **40**, 332-337.
22. N. H. Perry, J. J. Kim, S. R. Bishop and H. L. Tuller, *Journal of Materials Chemistry A*, 2015, **3**, 3602-3611.
23. C. Y. Park and A. J. Jacobson, *Solid State Ionics*, 2005, **176**, 2671-2676.
24. S. I. Elkalashy, T. V. Aksenova, A. S. Urusova and V. A. Cherepanov, *Solid State Ionics*, 2016, **295**, 96-103.
25. T. V. Aksenova, A. E. Vakhromeeva, S. I. Elkalashy, A. S. Urusova and V. A. Cherepanov, *Journal of Solid State Chemistry*, 2017, **251**, 70-78.
26. H. Bae, B. Singh, L. Mathur, J. H. Joo and S.-J. Song, *Journal of The Electrochemical Society*, 2021, **168**, 034511.
27. V. V. Sereda, D. S. Tsvetkov, I. L. Ivanov and A. Y. Zuev, *Acta Materialia*, 2019, **162**, 33-45.
28. V. V. Kharton, A. A. Yaremchenko, M. V. Patrakeev, E. N. Naumovich and F. M. B. Marques, *Journal of the European Ceramic Society*, 2003, **23**, 1417-1426.
29. A. Fossdal, M. Menon, I. Wærnhus, K. Wiik, M.-A. Einarsrud and T. Grande, *Journal of the American Ceramic Society*, 2004, **87**, 1952-1958.
30. H. Bae, J. Hong, B. Singh, A. K. Srivastava, J. H. Joo and S.-J. Song, *Journal of The Electrochemical Society*, 2019, **166**, F180-F189.
31. M. Kuhn, S. Hashimoto, K. Sato, K. Yashiro and J. Mizusaki, *Solid State Ionics*, 2011, **195**, 7-15.

32. C. de Leeuwe, W. Hu, D. Neagu, E. I. Papaioannou, S. Pramana, B. Ray, J. S. O. Evans and I. S. Metcalfe, *Journal of Solid State Chemistry*, 2021, **293**, 121838.
33. H. Bae, B. Singh, I.-H. Kim, H.-N. Im and S.-J. Song, *Journal of The Electrochemical Society*, 2018, **165**, F641-F651.
34. M. Kuhn, S. Hashimoto, K. Sato, K. Yashiro and J. Mizusaki, *Solid State Ionics*, 2013, **241**, 12-16.
35. S. R. Bishop, K. L. Duncan and E. D. Wachsman, *Journal of the American Ceramic Society*, 2010, **93**, 4115-4121.
36. S. B. Adler, *Journal of the American Ceramic Society*, 2001, **84**, 2117-2119.
37. S.-i. Hashimoto, Y. Fukuda, M. Kuhn, K. Sato, K. Yashiro and J. Mizusaki, *Solid State Ionics*, 2011, **186**, 37-43.
38. S. Wang, M. Katsuki, M. Dokiya and T. Hashimoto, *Solid State Ionics*, 2003, **159**, 71-78.
39. H. L. Lein, K. Wiik and T. Grande, *Solid State Ionics*, 2006, **177**, 1795-1798.
40. M.-B. Choi, S.-Y. Jeon, B. Singh, Y.-S. Yoo, J.-H. Hwang and S.-J. Song, *Acta Materialia*, 2014, **65**, 373-382.
41. Chen, Yu and S. B. Adler, *Chemistry of Materials*, 2005, **17**, 4537-4546.
42. A. Y. Zuev, A. I. Vylkov, A. N. Petrov and D. S. Tsvetkov, *Solid State Ionics*, 2008, **179**, 1876-1879.
43. P. Hjalmarsson, M. Sjøgaard and M. Mogensen, *Journal of Solid State Chemistry*, 2010, **183**, 1853-1862.
44. C. Bernuy-Lopez, K. Høydalsvik, M.-A. Einarsrud and T. Grande, *Materials*, 2016, **9**, 154-151-154-118.
45. D. A. Malyshkin, A. Y. Novikov, V. V. Sereda, I. L. Ivanov, D. S. Tsvetkov and A. Y. Zuev, *Inorganic Chemistry*, 2018, **57**, 12409-12416.
46. D. Malyshkin, A. Novikov, D. Tsvetkov and A. Zuev, *Materials Letters*, 2018, **229**, 324-326.
47. R. A. Cox-Galhotra, A. Huq, J. P. Hodges, C. Yu, X. Wang, W. Gong, A. J. Jacobson and S. McIntosh, *Solid State Ionics*, 2013, **249-250**, 34-40.
48. D. S. Tsvetkov, I. L. Ivanov, D. A. Malyshkin and A. Y. Zuev, *Dalton Transactions*, 2014, **43**, 11862-11866.
49. A. L. Sednev-Lugovets, V. V. Sereda, D. A. Malyshkin, D. S. Tsvetkov, I. L. Ivanov, A. Y. Zuev and A. Maignan, *The Journal of Chemical Thermodynamics*, 2021, **161**, 106523.
50. I. Szpunar, R. Strandbakke, M. H. Sørby, S. L. Wachowski, M. Balaguer, M. Tarach, J. M. Serra, A. Witkowska, E. Dzik, T. Norby, M. Gazda and A. Mielewczyk-Gryń, *Materials*, 2020, **13**, 4044.
51. R. A. Cox-Galhotra, A. Huq, J. P. Hodges, J.-H. Kim, C. Yu, X. Wang, A. J. Jacobson and S. McIntosh, *Journal of Materials Chemistry A*, 2013, **1**, 3091-3100.
52. A. Chatterjee, J. M. Caicedo, B. Ballesteros and J. Santiso, *Journal of Materials Chemistry A*, 2018, **6**, 12430-12439.
53. L. Mogni, F. Prado, C. Jiménez and A. Caneiro, *Solid State Ionics*, 2013, **240**, 19-28.
54. D. S. Tsvetkov, I. L. Ivanov, D. Malyshkin, V. V. Sereda and A. Y. Zuev, *ECS Transactions*, 2016, **72**, 21-35.
55. P. Karen, *Journal of Solid State Chemistry*, 2021, **299**, 122147.
56. P. Karen and P. M. Woodward, *Journal of Materials Chemistry*, 1999, **9**, 789-797.
57. P. Karen, P. M. Woodward, P. N. Santhosh, T. Vogt, P. W. Stephens and S. Pagola, *Journal of Solid State Chemistry*, 2002, **167**, 480-493.
58. J. Lindén, P. Karen, A. Kjekshus, J. Miettinen, T. Pietari and M. Karppinen, *Physical Review B*, 1999, **60**, 15251-15260.
59. J. Nakamura, J. Lindén, H. Yamauchi and M. Karppinen, *Solid State Communications*, 2002, **121**, 269-274.
60. P. Karen, K. Gustafsson and J. Lindén, *Journal of Solid State Chemistry*, 2007, **180**, 148-157.
61. P. Karen, *Journal of Solid State Chemistry*, 2003, **170**, 9-23.
62. V. S. Kudyakova, A. M. Shalamova, B. V. Politov and A. Y. Suntsov, *Journal of Alloys and Compounds*, 2021, **886**, 161133.
63. A. C. Tomkiewicz, M. A. Tamimi, A. Huq and S. McIntosh, *Journal of Power Sources*, 2016, **330**, 240-245.
64. R. Kircheisen and J. Töpfer, *Journal of Solid State Chemistry*, 2012, **185**, 76-81.

65. S. R. Bishop, D. Marrocchelli, C. Chatzichristodoulou, N. H. Perry, M. B. Mogensen, H. L. Tuller and E. D. Wachsman, *Annual Review of Materials Research*, 2014, **44**, 205-239.
66. T. Nakamura, Y. Ling and K. Amezawa, *Journal of Materials Chemistry A*, 2015, **3**, 10471-10479.
67. V. A. Cherepanov, T. V. Aksenova, L. Y. Gavrilova and K. N. Mikhaleva, *Solid State Ionics*, 2011, **188**, 53-57.
68. J. Lindén, M. Kochi, K. Lehmus, T. Pietari, M. Karppinen and H. Yamauchi, *Journal of Solid State Chemistry*, 2002, **166**, 118-127.
69. A. I. Klyndyuk, *Physics of the Solid State*, 2008, **50**, 609.
